# Supplementary material for: Non-invasive monitoring of arthritis treatment response via targeting of tyrosine-phosphorylated annexin A2 in chondrocytes
Source: PubMed Central journal article supplement (PMC8543875; doi:10.1186/s13075-021-02643-3), 2021-10-25

**Figure S6 | Tissue distribution of LS301 in extraarticular regions of the mouse extremity.**

A

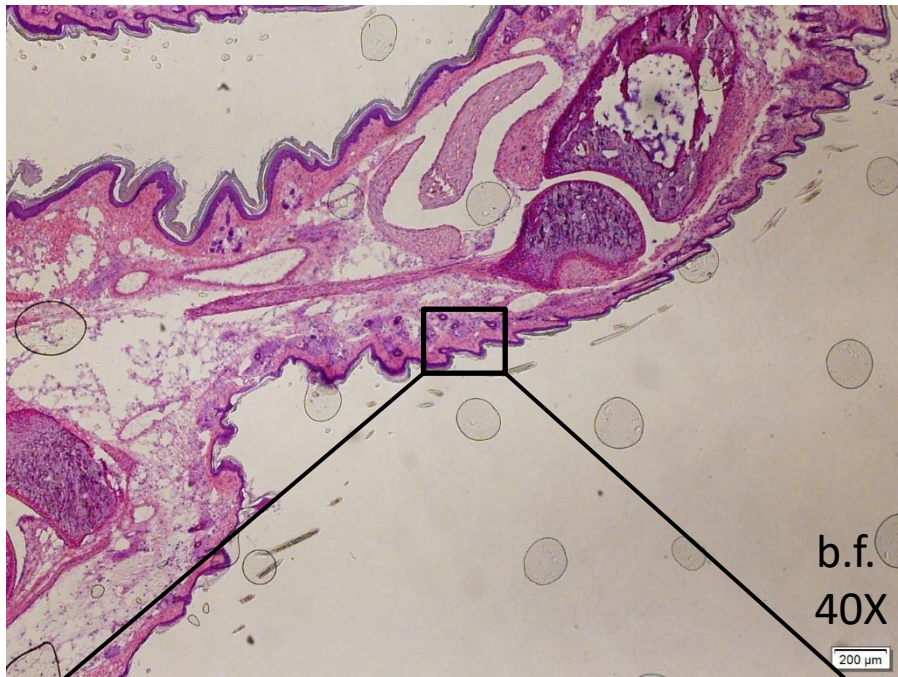

H&E

Skin/Dermis

LS301

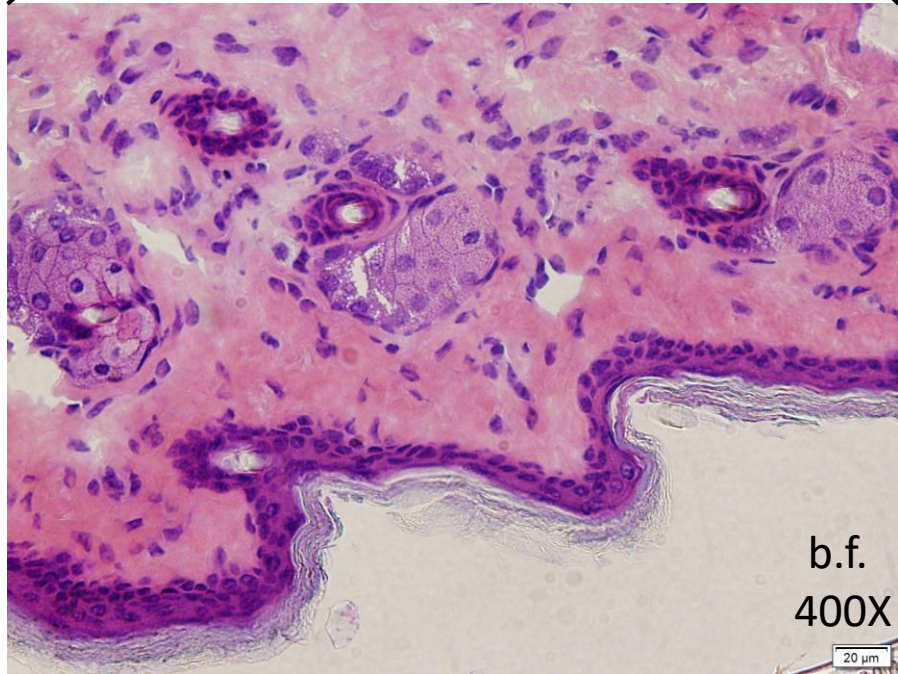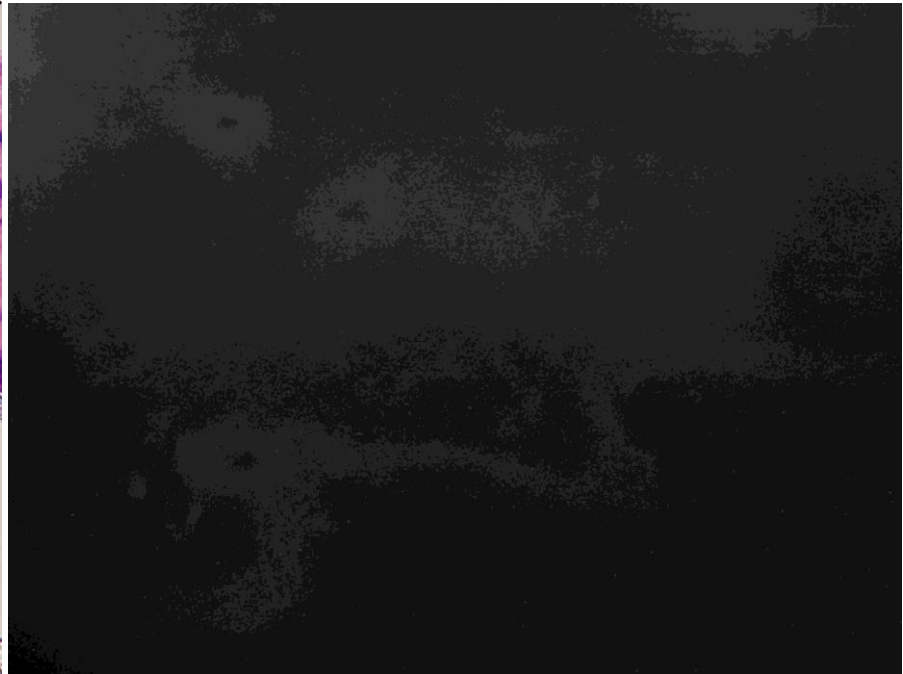



B

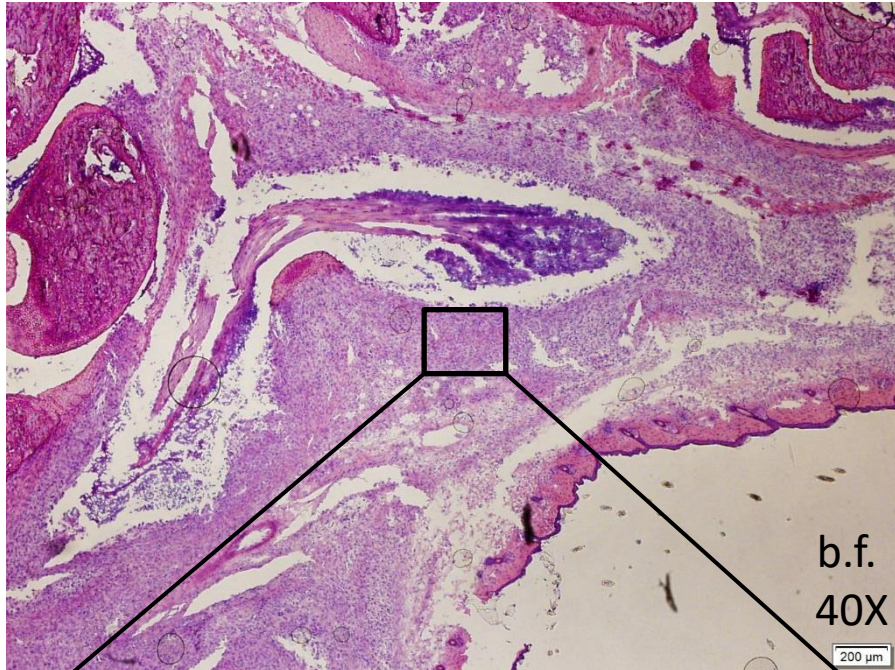

H&E

Connective tissue

LS301

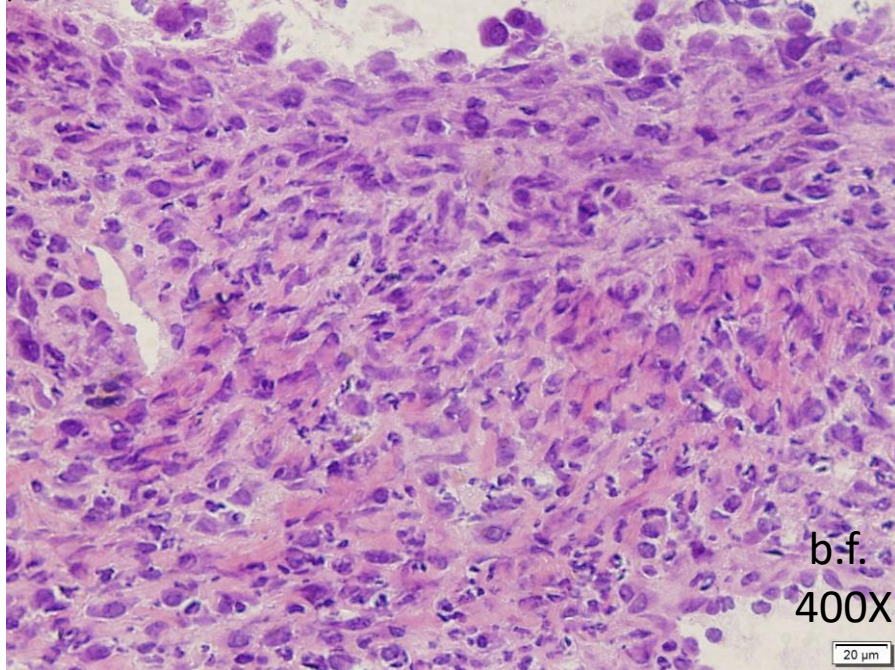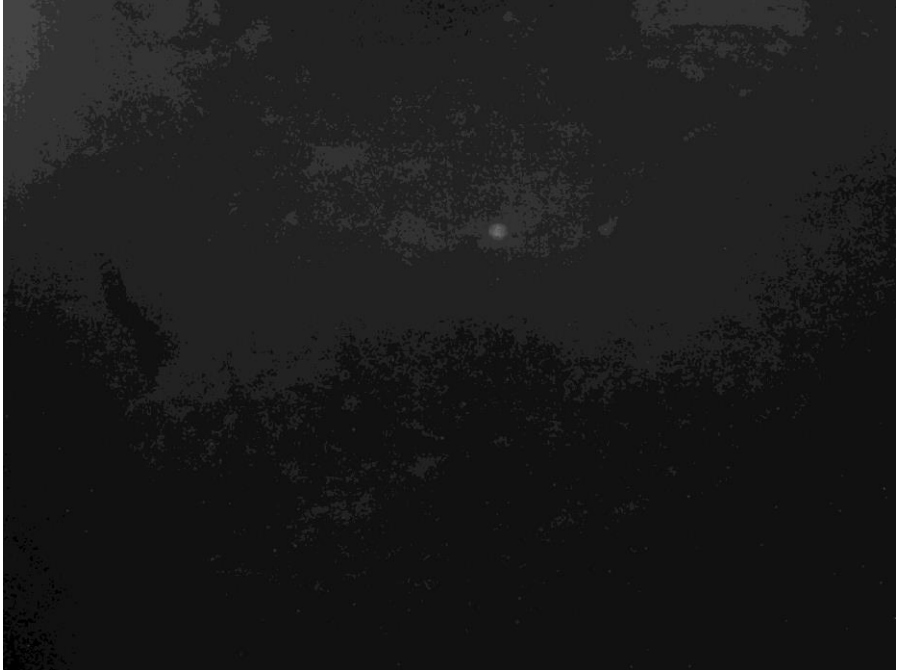



C

# Muscle

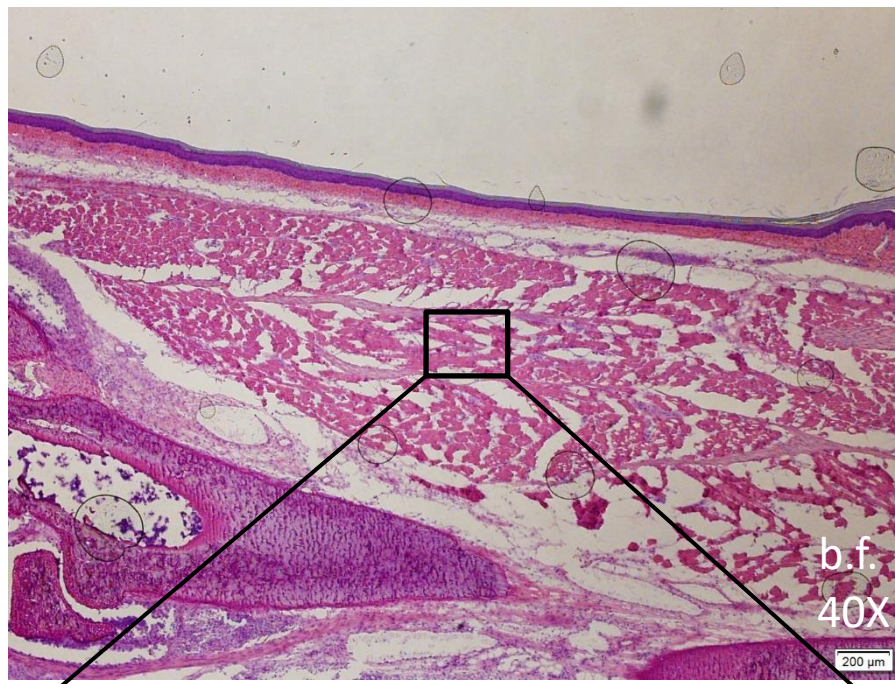

H&E

LS301

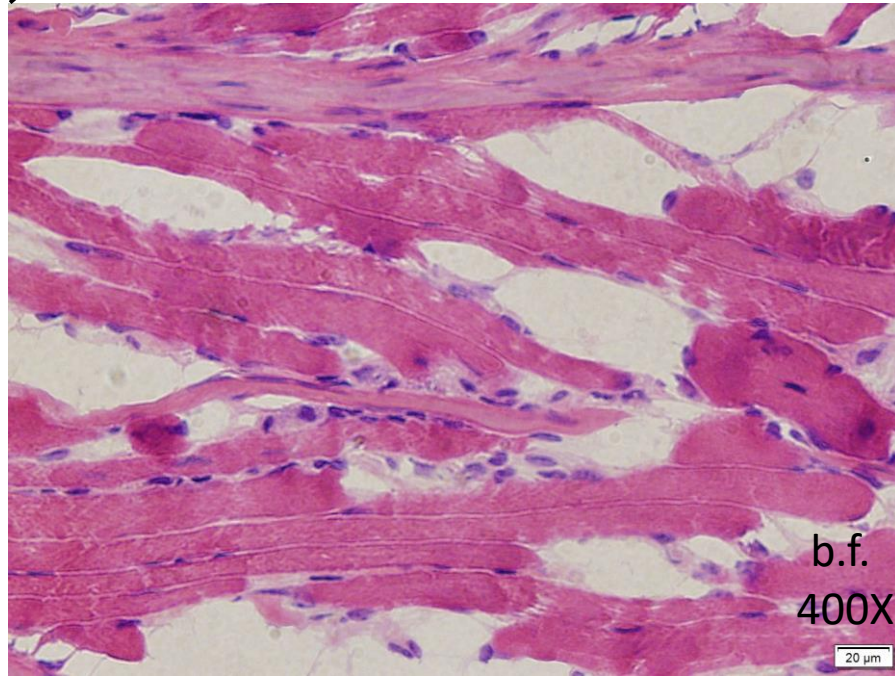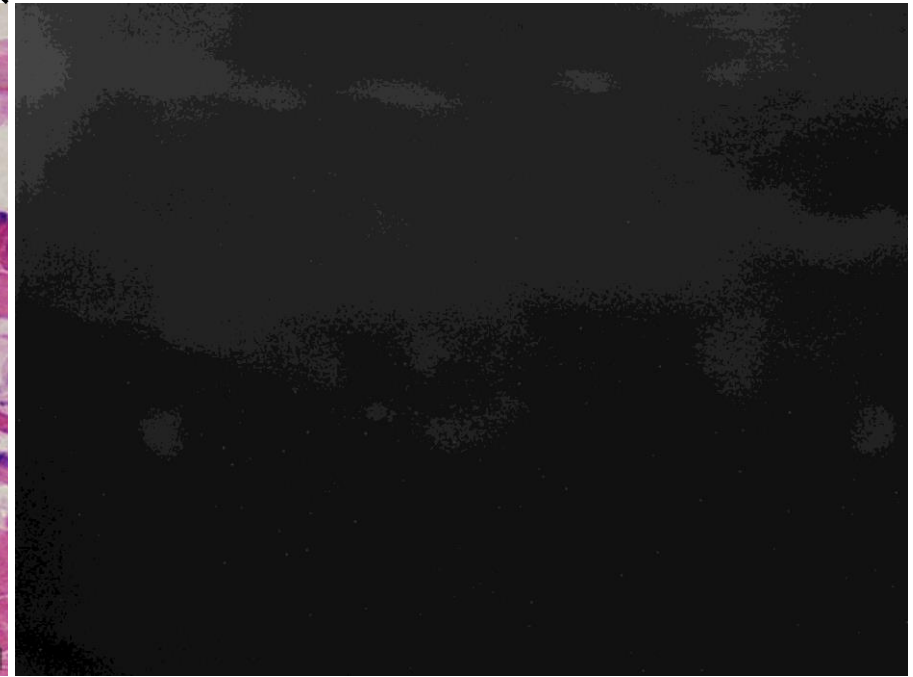



D

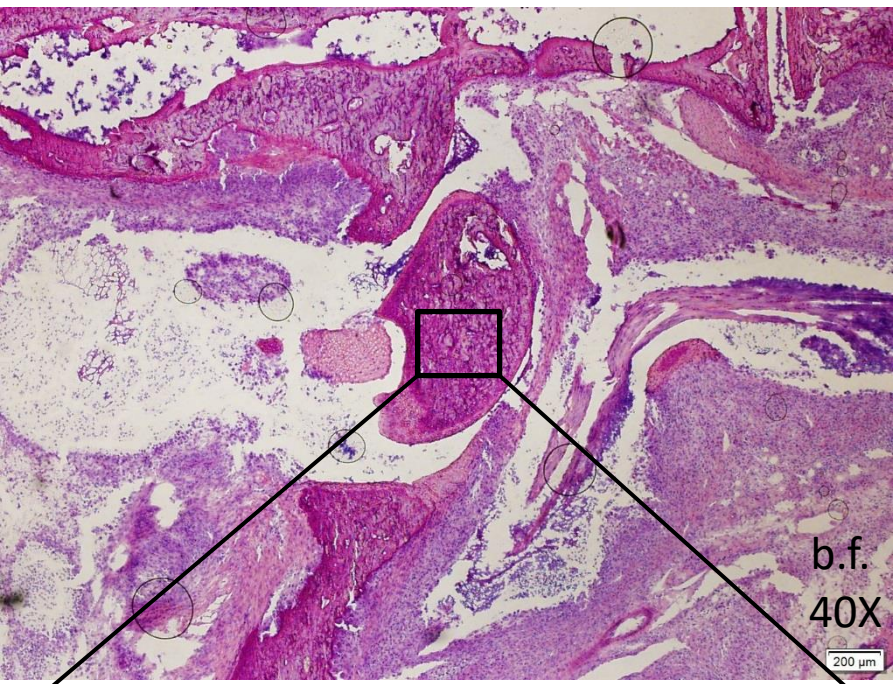

Bone

H&E

LS301

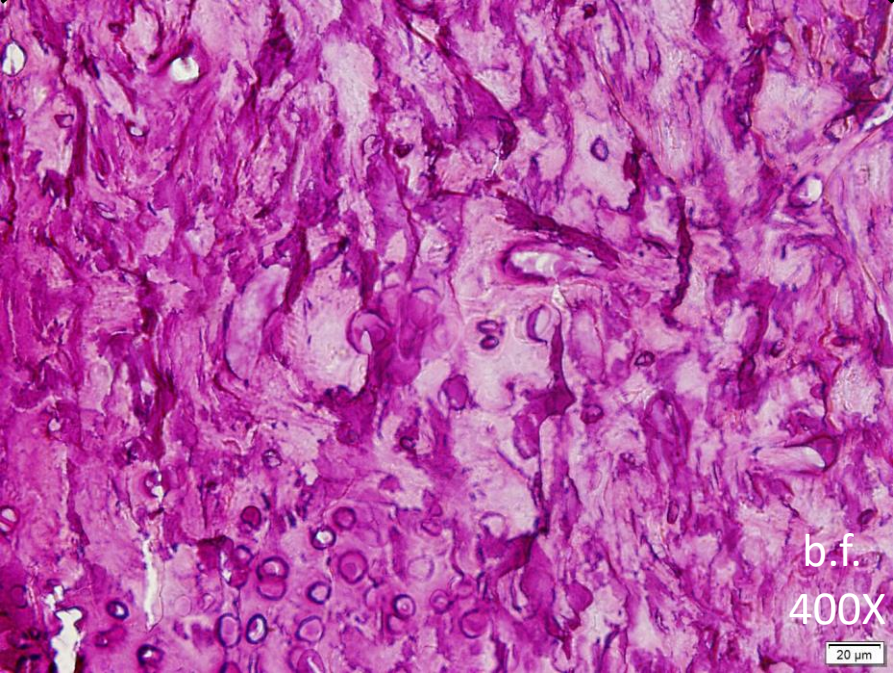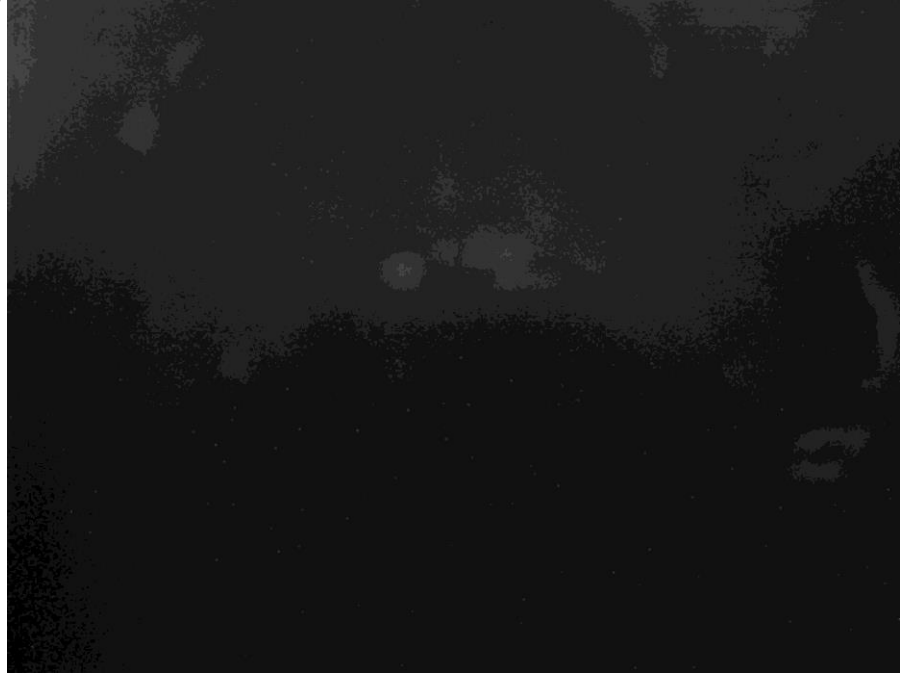



E

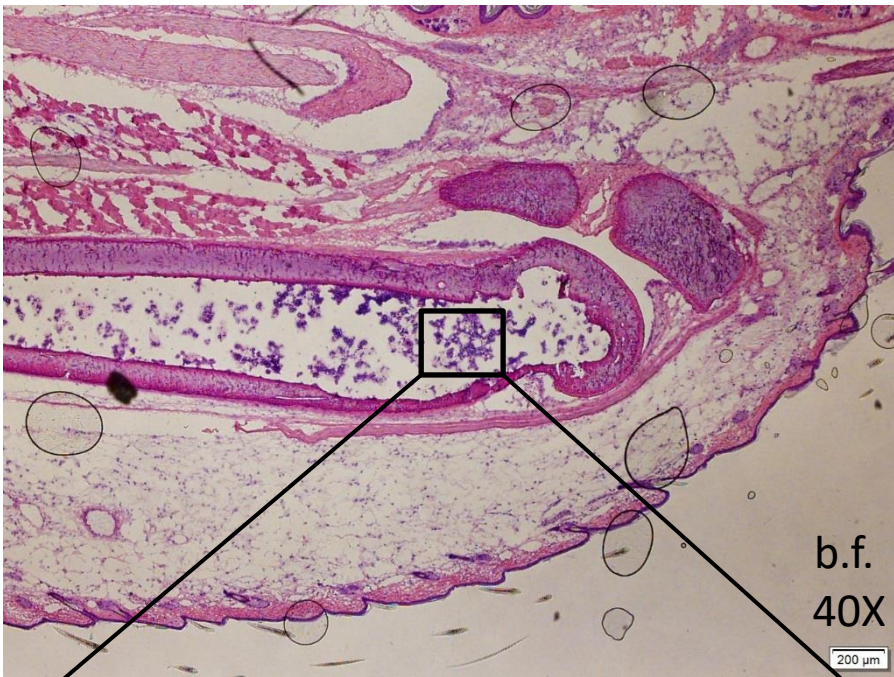

H&E

Bone marrow

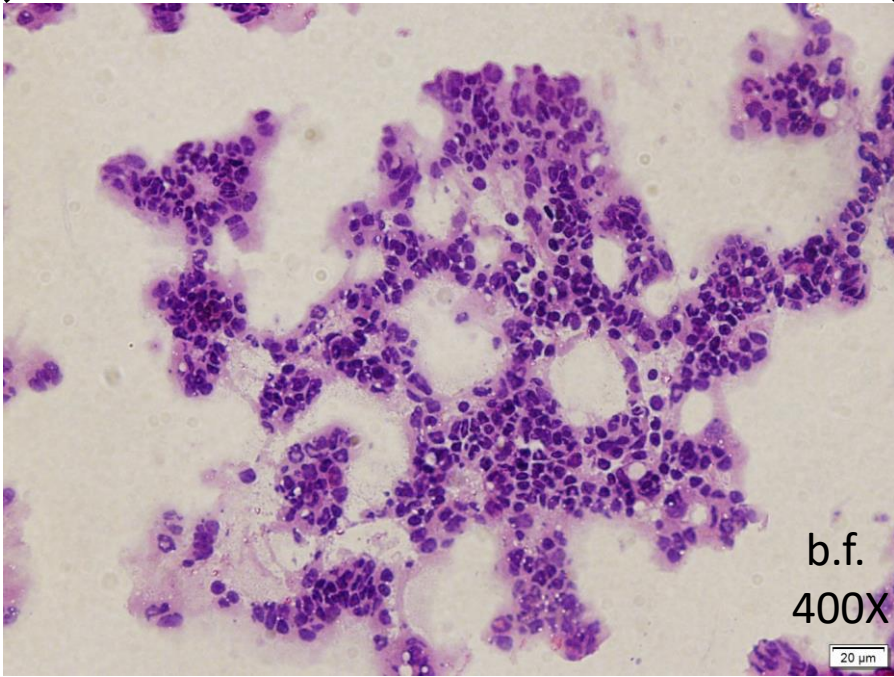

LS301

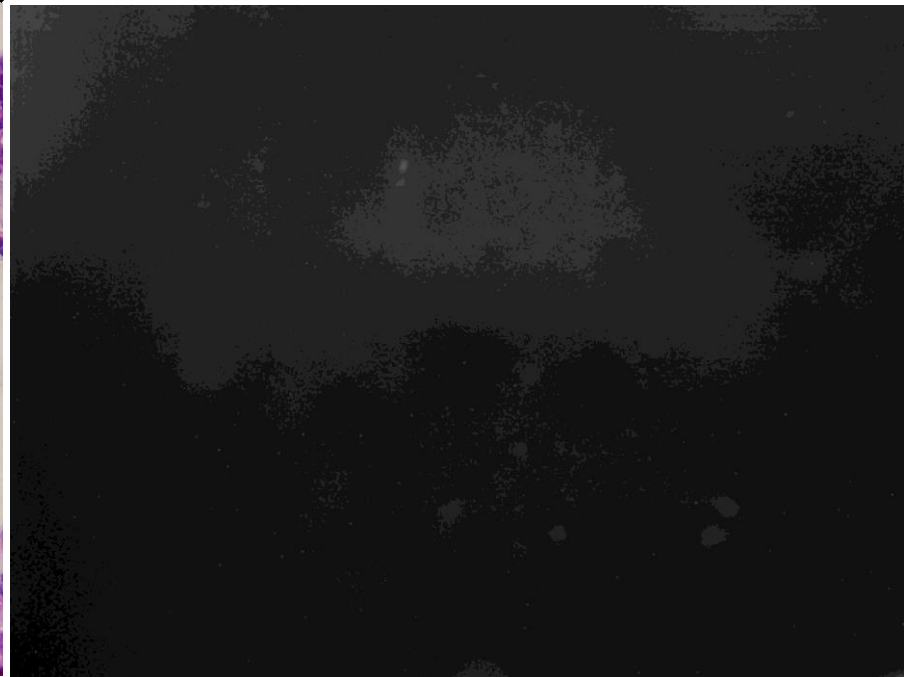

Supplement: 13075_2021_2643_MOESM6_ESM.pdf [file 13075_2021_2643_MOESM6_ESM.pdf]
