# Supplementary material for: Non-invasive monitoring of arthritis treatment response via targeting of tyrosine-phosphorylated annexin A2 in chondrocytes
Source: PubMed Central journal article supplement (PMC8543875; doi:10.1186/s13075-021-02643-3), 2021-10-25

**Figure S3 | Regions of interest (ROIs) used for quantitation of fluorescence in individual arthritic limbs.**

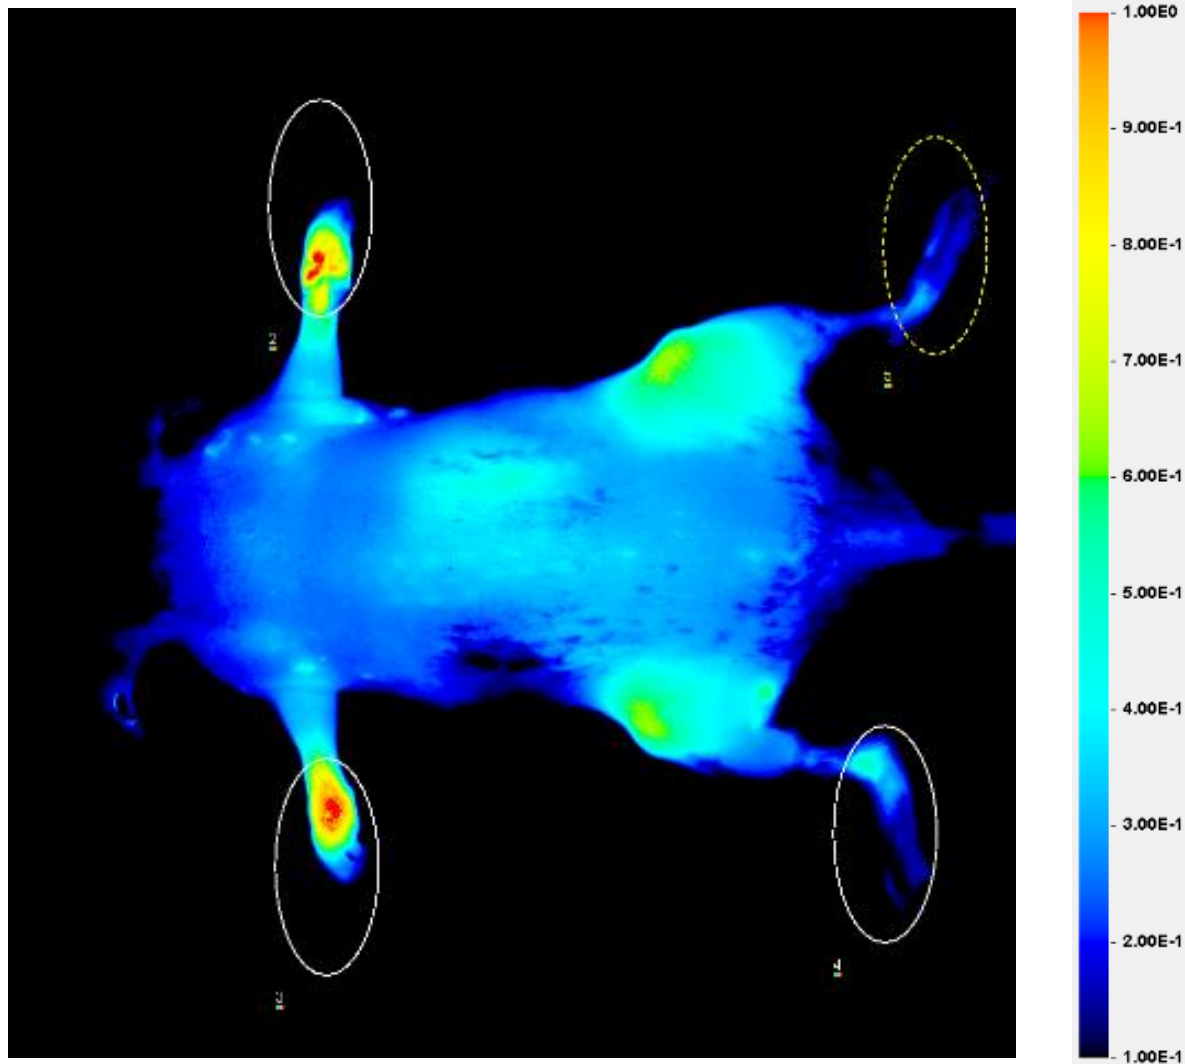

Supplement: 13075_2021_2643_MOESM3_ESM.pdf [file 13075_2021_2643_MOESM3_ESM.pdf]
